# Supplementary material
Source: PubMed Central journal article supplement (PMC7142693)
Supplement: mmc1.pdf [file mmc1.pdf]

**Cell Host & Microbe, Volume 27**

**Supplemental Information**

**A Sequence Homology and Bioinformatic Approach**

**Can Predict Candidate Targets for Immune**

**Responses to SARS-CoV-2**

**Alba Grifoni, John Sidney, Yun Zhang, Richard H. Scheuermann, Bjoern Peters, and Alessandro Sette**

**Table S2.** Predicted B cell epitopes from SARS-CoV-2 spike glycoprotein, membrane glycoprotein and nucleocapsid phosphoprotein using BebiPred 2.0. Related to the SARS-CoV-2 B cell epitope prediction STAR Method section.

| Protein                     | Start | End                | Peptide                                    | Length |
|-----------------------------|-------|--------------------|--------------------------------------------|--------|
| Spike glycoprotein          | 10    | 22                 | LVSSQCVNLTRT                               | 13     |
|                             | 65    | 75                 | FHAIHVSGTNG                                | 11     |
|                             | 109   | 126                | TLDSKTQSLIVNNATNV                          | 18     |
|                             | 146   | 168                | HKNNKSWMESEFRVYSSANNCTF                    | 23     |
|                             | 251   | 262                | PGDSSSGWTAGA                               | 12     |
|                             | 280   | 288                | NENGTITDA                                  | 9      |
|                             | 312   | 320                | IYQTSNFRV                                  | 9      |
|                             | 356   | 376                | KRISNCVADYSVLYNSASFST                      | 21     |
|                             | 434   | 444                | IAWNSNNLDSK                                | 11     |
|                             | 469   | 483                | STEIYQAGSTPCNGV                            | 15     |
|                             | 526   | 556                | GPKKSTNLVKNKCVNFNFNGLTGTGVLTESN            | 31     |
|                             | 592   | 620                | FGGVSVITPGTNTSNQVAVLYQDVNCTEV              | 29     |
|                             | 634   | 647                | RVYSTGSNVFQTRA                             | 14     |
|                             | 652   | 661                | GAEHVNNSYE                                 | 10     |
|                             | 673   | 713                | SYQTQTNSPRRARSVASQSIIAYTMSLGAENSVAYSNNNSIA | 41     |
|                             | 719   | 739                | TISVTTEILPVSMTKTSVDCT                      | 21     |
|                             | 741   | 755                | YICGDSTECNLLLQ                             | 15     |
|                             | 757   | 769                | GSFCTQLNRALTG                              | 13     |
|                             | 771   | 780                | AVEQDKNTQE                                 | 10     |
|                             | 867   | 880                | DEMIAQYTSALLAG                             | 14     |
|                             | 915   | 946                | VLYENQKLIANQFNSAIGKIQDLSSTASALG            | 32     |
|                             | 948   | 975                | LQDVVNQNAQALNTLVKQLSSNFGAISS               | 28     |
|                             | 1001  | 1009               | LQSLQTYVT                                  | 9      |
| 1019                        | 1036  | RASANLAATKMSECVLGQ | 18                                         |        |
| 1117                        | 1127  | TDNTFVSGNCD        | 11                                         |        |
| 1157                        | 1164  | KNHTSPDV           | 8                                          |        |
| 1171                        | 1180  | GINASVVNIQ         | 10                                         |        |
| 1188                        | 1197  | EVAKNLNESL         | 10                                         |        |
| 1229                        | 1239  | MVTIMLCCMTS        | 11                                         |        |
| Membrane glycoprotein       | 105   | 117                | RTRSMWSFNPETN                              | 13     |
|                             | 168   | 195                | ITVATSRTLSYYKLGASQRVAGDSGFAA               | 28     |
|                             | 203   | 218                | NYKLNTDHSSSSDNIA                           | 16     |
| Nucleocapsid phosphoprotein | 22    | 31                 | DSTGSNQNGE                                 | 10     |
|                             | 177   | 215                | RGGSQASSRSSRSRNSRNSTPGSSRGTS ParmAGNGG     | 39     |
|                             | 232   | 251                | SKMSGKGGQQGQTVTKKSA                        | 20     |
|                             | 405   | 416                | KQLQQSMSSADS                               | 12     |

**Table S4.** Prediction of CD4 T cells epitopes listed by SARS-COV-2 proteins. Related to the SARS-CoV-2 T cell epitope prediction STAR Method section.

| SARS-CoV-2 CD4 Megapool*    |             | protein length | Percentage of composition | number of epitopes |
|-----------------------------|-------------|----------------|---------------------------|--------------------|
| <b>orf1ab polyprotein</b>   | nsp1        | 180            | 0.83                      | 2                  |
|                             | nsp2        | 638            | 5.81                      | 14                 |
|                             | PLpro       | 1945           | 14.11                     | 34                 |
|                             | nsp4        | 500            | 9.13                      | 22                 |
|                             | 3CL         | 306            | 2.49                      | 6                  |
|                             | nsp6        | 290            | 7.47                      | 18                 |
|                             | nsp7        | 83             | 1.66                      | 4                  |
|                             | nsp8        | 198            | 2.07                      | 5                  |
|                             | nsp9        | 113            | 0.83                      | 2                  |
|                             | nsp10       | 138            | 0.83                      | 2                  |
|                             | RdRpol      | 933            | 7.88                      | 19                 |
|                             | Hel         | 601            | 5.81                      | 14                 |
|                             | nsp14       | 527            | 7.88                      | 19                 |
|                             | nsp15       | 346            | 1.66                      | 4                  |
|                             | nsp16       | 297            | 3.73                      | 9                  |
| Surface glycoprotein        | 1273        | 8.30           | 20                        |                    |
| ORF3a                       | 275         | 4.15           | 10                        |                    |
| envelope protein            | 75          | 3.32           | 8                         |                    |
| membrane glycoprotein       | 222         | 3.32           | 8                         |                    |
| ORF6                        | 61          | 2.49           | 6                         |                    |
| ORF7a                       | 121         | 1.66           | 4                         |                    |
| ORF8                        | 121         | 1.24           | 3                         |                    |
| nucleocapsid phosphoprotein | 419         | 2.90           | 7                         |                    |
| ORF10                       | 38          | 0.41           | 1                         |                    |
| <b>Total</b>                | <b>9700</b> | <b>100</b>     | <b>241</b>                |                    |

**Table S5.** Top 12 HLA class I alleles with a worldwide population frequency  $\geq 6\%$ . Related to the SARS-CoV-2 T cell epitope prediction STAR Method section.

| <b>HLA alleles</b> | <b>Frequency in worldwide population</b> |
|--------------------|------------------------------------------|
| HLA-A*01:01        | 16.2                                     |
| HLA-A*02:01        | 25.2                                     |
| HLA-A*03:01        | 15.4                                     |
| HLA-A*11:01        | 12.9                                     |
| HLA-A*23:01        | 6.4                                      |
| HLA-A*24:02        | 16.8                                     |
| HLA-B*07:02        | 13.3                                     |
| HLA-B*08:01        | 11.5                                     |
| HLA-B*35:01        | 6.5                                      |
| HLA-B*40:01        | 10.3                                     |
| HLA-B*44:02        | 9.2                                      |
| HLA-B*44:03        | 7.6                                      |
